# Supplementary material for: Environmental Niche Modelling Predicts a Contraction in the Potential Distribution of Two Boreal Owl Species under Different Climate Scenarios
Source: MDPI journal article supplement (doi:10.3390/ani12223226), 2022-11-21
Supplement: s1 [file s1]

**Table S1.** Boreal (*Aegolius funereus*) and Eurasian Pygmy Owl (*Glaucidium passerinum*) occurrence coordinates obtained from (1) an online database [5], (2) scientific and grey literature and (3) records from targeted field surveys using GPS devices which includes most data (> 80%) used in this study.

| Species           | Latitude | Longitude |
|-------------------|----------|-----------|
| Aegolius funereus | 44.22101 | 16.83644  |
| Aegolius funereus | 43.83642 | 18.45638  |
| Aegolius funereus | 44.18741 | 18.37719  |
| Aegolius funereus | 44.17207 | 18.28258  |
| Aegolius funereus | 44.16781 | 18.30194  |
| Aegolius funereus | 44.17173 | 18.31666  |
| Aegolius funereus | 44.18913 | 18.28449  |
| Aegolius funereus | 44.19173 | 18.29394  |
| Aegolius funereus | 44.19354 | 18.30965  |
| Aegolius funereus | 44.19036 | 18.31734  |
| Aegolius funereus | 44.18468 | 18.29479  |
| Aegolius funereus | 44.1806  | 18.30181  |
| Aegolius funereus | 43.29624 | 18.73154  |
| Aegolius funereus | 43.71486 | 17.50045  |
| Aegolius funereus | 43.70673 | 17.49699  |
| Aegolius funereus | 44.1875  | 18.37699  |
| Aegolius funereus | 44.21441 | 18.30605  |
| Aegolius funereus | 44.18015 | 18.31191  |
| Aegolius funereus | 43.31054 | 18.72877  |
| Aegolius funereus | 43.31575 | 18.71797  |
| Aegolius funereus | 43.32207 | 18.70735  |
| Aegolius funereus | 43.98257 | 17.73354  |
| Aegolius funereus | 43.30484 | 18.73933  |
| Aegolius funereus | 43.30489 | 18.75393  |
| Aegolius funereus | 43.30779 | 18.76264  |
| Aegolius funereus | 43.31418 | 18.76228  |
| Aegolius funereus | 43.9912  | 17.76828  |
| Aegolius funereus | 44.20021 | 17.02548  |
| Aegolius funereus | 44.18539 | 17.03101  |
| Aegolius funereus | 44.16734 | 17.03486  |
| Aegolius funereus | 44.15158 | 17.05083  |
| Aegolius funereus | 44.14357 | 17.05956  |
| Aegolius funereus | 44.13326 | 17.27665  |
| Aegolius funereus | 44.14843 | 17.2774   |
| Aegolius funereus | 44.1565  | 17.26954  |
| Aegolius funereus | 44.3959  | 16.74346  |
| Aegolius funereus | 44.40697 | 16.7377   |
| Aegolius funereus | 44.38549 | 16.73414  |
| Aegolius funereus | 44.38037 | 16.65128  |

|                   |          |          |
|-------------------|----------|----------|
| Aegolius funereus | 44.39159 | 16.60417 |
| Aegolius funereus | 44.23511 | 17.21926 |
| Aegolius funereus | 44.21809 | 17.23399 |
| Aegolius funereus | 44.23162 | 17.23293 |
| Aegolius funereus | 44.26911 | 17.18464 |
| Aegolius funereus | 44.26755 | 17.169   |
| Aegolius funereus | 44.08355 | 17.2502  |
| Aegolius funereus | 44.10015 | 17.25035 |
| Aegolius funereus | 44.10033 | 17.23492 |
| Aegolius funereus | 44.08558 | 17.23467 |
| Aegolius funereus | 44.08515 | 17.21813 |
| Aegolius funereus | 44.09935 | 17.20129 |
| Aegolius funereus | 44.09751 | 17.18739 |
| Aegolius funereus | 43.73545 | 18.27256 |
| Aegolius funereus | 43.73073 | 18.244   |
| Aegolius funereus | 43.88861 | 17.42449 |
| Aegolius funereus | 43.86342 | 17.38073 |
| Aegolius funereus | 43.86486 | 17.39541 |
| Aegolius funereus | 43.87854 | 17.41252 |
| Aegolius funereus | 44.27833 | 17.55893 |
| Aegolius funereus | 44.29695 | 18.01617 |
| Aegolius funereus | 43.45417 | 18.85095 |
| Aegolius funereus | 43.8808  | 17.09754 |
| Aegolius funereus | 44.1423  | 18.43292 |
| Aegolius funereus | 44.19973 | 16.88602 |
| Aegolius funereus | 44.30812 | 18.54866 |
| Aegolius funereus | 41.83779 | 23.38458 |
| Aegolius funereus | 41.82355 | 23.38395 |
| Aegolius funereus | 41.82865 | 23.37865 |
| Aegolius funereus | 41.67565 | 23.55166 |
| Aegolius funereus | 41.75154 | 23.52968 |
| Aegolius funereus | 41.84285 | 23.38904 |
| Aegolius funereus | 41.8339  | 23.4271  |
| Aegolius funereus | 41.76696 | 23.526   |
| Aegolius funereus | 41.83665 | 23.40068 |
| Aegolius funereus | 41.78215 | 23.43343 |
| Aegolius funereus | 41.77677 | 23.44539 |
| Aegolius funereus | 41.79613 | 23.45538 |
| Aegolius funereus | 41.79519 | 23.44296 |
| Aegolius funereus | 41.77935 | 23.45575 |
| Aegolius funereus | 41.78968 | 23.43831 |
| Aegolius funereus | 41.77271 | 23.42934 |
| Aegolius funereus | 41.79439 | 23.48632 |

|                   |          |          |
|-------------------|----------|----------|
| Aegolius funereus | 41.84519 | 23.34126 |
| Aegolius funereus | 41.84867 | 23.34162 |
| Aegolius funereus | 41.84222 | 23.34149 |
| Aegolius funereus | 41.85329 | 23.31781 |
| Aegolius funereus | 41.87446 | 24.29696 |
| Aegolius funereus | 42.22456 | 23.42439 |
| Aegolius funereus | 42.08228 | 23.62336 |
| Aegolius funereus | 42.25317 | 23.59392 |
| Aegolius funereus | 42.21031 | 23.39254 |
| Aegolius funereus | 42.23214 | 23.431   |
| Aegolius funereus | 42.21678 | 23.4515  |
| Aegolius funereus | 42.23083 | 23.50794 |
| Aegolius funereus | 42.24897 | 23.29953 |
| Aegolius funereus | 42.23058 | 23.34747 |
| Aegolius funereus | 42.24812 | 23.30988 |
| Aegolius funereus | 42.25692 | 23.30053 |
| Aegolius funereus | 41.62184 | 24.64377 |
| Aegolius funereus | 41.61388 | 24.63161 |
| Aegolius funereus | 41.65889 | 24.25637 |
| Aegolius funereus | 41.64953 | 24.30142 |
| Aegolius funereus | 41.76179 | 24.14196 |
| Aegolius funereus | 41.68954 | 24.13293 |
| Aegolius funereus | 41.70488 | 24.8924  |
| Aegolius funereus | 42.22449 | 23.42443 |
| Aegolius funereus | 41.8652  | 24.30416 |
| Aegolius funereus | 41.88789 | 24.30809 |
| Aegolius funereus | 41.82535 | 24.04466 |
| Aegolius funereus | 41.83969 | 24.01259 |
| Aegolius funereus | 41.80041 | 23.99656 |
| Aegolius funereus | 41.81349 | 23.99137 |
| Aegolius funereus | 41.74489 | 23.96535 |
| Aegolius funereus | 41.79915 | 24.12557 |
| Aegolius funereus | 43.45281 | 22.63336 |
| Aegolius funereus | 42.10796 | 23.32935 |
| Aegolius funereus | 42.26626 | 23.60387 |
| Aegolius funereus | 42.17939 | 23.57872 |
| Aegolius funereus | 41.6999  | 24.38047 |
| Aegolius funereus | 41.74461 | 24.30156 |
| Aegolius funereus | 42.65724 | 24.86389 |
| Aegolius funereus | 42.20726 | 23.12116 |
| Aegolius funereus | 42.1947  | 23.70715 |
| Aegolius funereus | 42.68633 | 24.83084 |
| Aegolius funereus | 41.72426 | 24.58018 |

|                   |          |          |
|-------------------|----------|----------|
| Aegolius funereus | 41.72204 | 24.597   |
| Aegolius funereus | 41.71304 | 24.60129 |
| Aegolius funereus | 41.70986 | 24.6096  |
| Aegolius funereus | 41.70902 | 24.62421 |
| Aegolius funereus | 41.7029  | 24.63194 |
| Aegolius funereus | 41.69878 | 24.64123 |
| Aegolius funereus | 41.61256 | 24.62816 |
| Aegolius funereus | 41.61438 | 24.60636 |
| Aegolius funereus | 41.62025 | 24.61404 |
| Aegolius funereus | 41.62635 | 24.60612 |
| Aegolius funereus | 41.62338 | 24.60313 |
| Aegolius funereus | 41.61882 | 24.58387 |
| Aegolius funereus | 41.62365 | 24.56735 |
| Aegolius funereus | 41.64173 | 24.53069 |
| Aegolius funereus | 41.6453  | 24.53644 |
| Aegolius funereus | 41.647   | 24.52601 |
| Aegolius funereus | 41.64679 | 24.55021 |
| Aegolius funereus | 43.17814 | 23.0697  |
| Aegolius funereus | 41.51567 | 23.64118 |
| Aegolius funereus | 41.53274 | 23.64978 |
| Aegolius funereus | 43.43959 | 22.62989 |
| Aegolius funereus | 42.17633 | 22.62285 |
| Aegolius funereus | 42.13226 | 23.33895 |
| Aegolius funereus | 41.41124 | 23.64491 |
| Aegolius funereus | 42.47991 | 23.38377 |
| Aegolius funereus | 42.58994 | 23.23265 |
| Aegolius funereus | 42.63239 | 23.23889 |
| Aegolius funereus | 43.43439 | 22.63936 |
| Aegolius funereus | 41.92309 | 23.37121 |
| Aegolius funereus | 41.5497  | 23.63307 |
| Aegolius funereus | 41.81022 | 24.07755 |
| Aegolius funereus | 41.86918 | 23.90758 |
| Aegolius funereus | 44.83064 | 15.5208  |
| Aegolius funereus | 45.40751 | 14.46691 |
| Aegolius funereus | 44.92828 | 15.4649  |
| Aegolius funereus | 44.87701 | 15.49517 |
| Aegolius funereus | 44.94144 | 15.51684 |
| Aegolius funereus | 44.91586 | 15.5242  |
| Aegolius funereus | 45.30255 | 14.84416 |
| Aegolius funereus | 45.33578 | 14.81525 |
| Aegolius funereus | 45.33427 | 14.79095 |
| Aegolius funereus | 45.33869 | 14.82654 |
| Aegolius funereus | 45.28334 | 14.84237 |

|                   |          |          |
|-------------------|----------|----------|
| Aegolius funereus | 44.66705 | 15.06964 |
| Aegolius funereus | 44.696   | 15.05709 |
| Aegolius funereus | 44.73737 | 15.02959 |
| Aegolius funereus | 44.76893 | 15.02845 |
| Aegolius funereus | 45.47037 | 14.73392 |
| Aegolius funereus | 44.92759 | 15.31819 |
| Aegolius funereus | 45.42014 | 15.16966 |
| Aegolius funereus | 44.87005 | 15.60067 |
| Aegolius funereus | 44.83624 | 15.52842 |
| Aegolius funereus | 44.74949 | 15.17443 |
| Aegolius funereus | 40.0459  | 20.7992  |
| Aegolius funereus | 41.48021 | 24.32703 |
| Aegolius funereus | 38.81974 | 22.321   |
| Aegolius funereus | 41.33944 | 24.72885 |
| Aegolius funereus | 40.06931 | 22.40862 |
| Aegolius funereus | 41.49965 | 24.2994  |
| Aegolius funereus | 41.48847 | 24.3226  |
| Aegolius funereus | 41.51003 | 24.35457 |
| Aegolius funereus | 40.11827 | 22.39757 |
| Aegolius funereus | 42.03078 | 20.85402 |
| Aegolius funereus | 42.02805 | 20.86934 |
| Aegolius funereus | 42.03124 | 20.86368 |
| Aegolius funereus | 41.82155 | 20.66639 |
| Aegolius funereus | 41.81807 | 20.64622 |
| Aegolius funereus | 43.23931 | 19.2377  |
| Aegolius funereus | 43.04824 | 19.54495 |
| Aegolius funereus | 43.21493 | 19.25788 |
| Aegolius funereus | 43.27316 | 18.92481 |
| Aegolius funereus | 43.03808 | 19.4449  |
| Aegolius funereus | 42.663   | 20.02061 |
| Aegolius funereus | 42.87971 | 19.71801 |
| Aegolius funereus | 42.69229 | 19.60614 |
| Aegolius funereus | 43.08101 | 19.27795 |
| Aegolius funereus | 43.5066  | 19.18477 |
| Aegolius funereus | 43.21904 | 19.30364 |
| Aegolius funereus | 42.76328 | 20.16427 |
| Aegolius funereus | 42.76949 | 20.14818 |
| Aegolius funereus | 43.1959  | 19.04221 |
| Aegolius funereus | 43.2122  | 19.26784 |
| Aegolius funereus | 43.26864 | 18.9112  |
| Aegolius funereus | 43.24681 | 19.25971 |
| Aegolius funereus | 43.52034 | 19.16038 |
| Aegolius funereus | 42.59592 | 20.03643 |

|                   |          |          |
|-------------------|----------|----------|
| Aegolius funereus | 42.78293 | 20.12753 |
| Aegolius funereus | 43.23126 | 19.22834 |
| Aegolius funereus | 43.04238 | 19.4491  |
| Aegolius funereus | 43.13495 | 19.27158 |
| Aegolius funereus | 43.07433 | 19.23351 |
| Aegolius funereus | 43.52143 | 19.14078 |
| Aegolius funereus | 43.07958 | 19.25529 |
| Aegolius funereus | 43.07099 | 19.27782 |
| Aegolius funereus | 43.20902 | 19.31426 |
| Aegolius funereus | 43.50157 | 19.19266 |
| Aegolius funereus | 42.60513 | 20.04309 |
| Aegolius funereus | 42.75449 | 19.97547 |
| Aegolius funereus | 42.58062 | 20.03852 |
| Aegolius funereus | 42.70371 | 19.90698 |
| Aegolius funereus | 43.14437 | 19.3736  |
| Aegolius funereus | 43.15294 | 19.35925 |
| Aegolius funereus | 43.14606 | 19.38381 |
| Aegolius funereus | 43.16717 | 19.33955 |
| Aegolius funereus | 43.1774  | 19.36023 |
| Aegolius funereus | 43.18363 | 19.34999 |
| Aegolius funereus | 43.18625 | 19.3389  |
| Aegolius funereus | 43.19186 | 19.33153 |
| Aegolius funereus | 43.27369 | 19.22769 |
| Aegolius funereus | 43.27478 | 19.20175 |
| Aegolius funereus | 43.26323 | 19.21711 |
| Aegolius funereus | 43.25738 | 19.22547 |
| Aegolius funereus | 43.25514 | 19.23517 |
| Aegolius funereus | 43.19505 | 19.42376 |
| Aegolius funereus | 43.19714 | 19.41393 |
| Aegolius funereus | 43.20766 | 19.39491 |
| Aegolius funereus | 43.22694 | 19.36423 |
| Aegolius funereus | 43.23525 | 19.35989 |
| Aegolius funereus | 43.09388 | 19.2159  |
| Aegolius funereus | 43.08645 | 19.22429 |
| Aegolius funereus | 43.06677 | 19.24745 |
| Aegolius funereus | 43.08695 | 19.25925 |
| Aegolius funereus | 43.09595 | 19.25913 |
| Aegolius funereus | 43.1011  | 19.24957 |
| Aegolius funereus | 43.10855 | 19.24053 |
| Aegolius funereus | 43.13366 | 19.24746 |
| Aegolius funereus | 43.06429 | 19.48049 |
| Aegolius funereus | 43.07888 | 19.47085 |
| Aegolius funereus | 43.0801  | 19.45677 |

|                   |          |          |
|-------------------|----------|----------|
| Aegolius funereus | 43.04154 | 19.50567 |
| Aegolius funereus | 43.04833 | 19.49231 |
| Aegolius funereus | 43.08316 | 19.48422 |
| Aegolius funereus | 43.08269 | 19.49603 |
| Aegolius funereus | 43.07613 | 19.5076  |
| Aegolius funereus | 43.06841 | 19.50943 |
| Aegolius funereus | 42.7281  | 19.68858 |
| Aegolius funereus | 42.66118 | 19.83772 |
| Aegolius funereus | 43.3369  | 20.2641  |
| Aegolius funereus | 43.3465  | 20.2669  |
| Aegolius funereus | 43.3432  | 20.2428  |
| Aegolius funereus | 43.345   | 20.2805  |
| Aegolius funereus | 43.3392  | 20.285   |
| Aegolius funereus | 43.3321  | 20.2954  |
| Aegolius funereus | 43.2997  | 20.3167  |
| Aegolius funereus | 43.3059  | 20.3076  |
| Aegolius funereus | 43.3274  | 20.312   |
| Aegolius funereus | 43.3171  | 20.3041  |
| Aegolius funereus | 43.4174  | 20.2719  |
| Aegolius funereus | 43.4052  | 20.2738  |
| Aegolius funereus | 43.3242  | 20.3489  |
| Aegolius funereus | 43.3184  | 20.3871  |
| Aegolius funereus | 43.3072  | 20.3815  |
| Aegolius funereus | 43.2969  | 20.3345  |
| Aegolius funereus | 43.3315  | 20.288   |
| Aegolius funereus | 42.7739  | 21.9551  |
| Aegolius funereus | 43.4813  | 20.8     |
| Aegolius funereus | 42.8901  | 20.4289  |
| Aegolius funereus | 42.8612  | 20.3633  |
| Aegolius funereus | 42.8529  | 20.3598  |
| Aegolius funereus | 42.8518  | 20.3497  |
| Aegolius funereus | 43.3078  | 19.786   |
| Aegolius funereus | 43.3138  | 19.7706  |
| Aegolius funereus | 43.308   | 19.5387  |
| Aegolius funereus | 43.3197  | 19.5319  |
| Aegolius funereus | 43.4142  | 19.8077  |
| Aegolius funereus | 43.4078  | 19.8131  |
| Aegolius funereus | 43.4371  | 19.8251  |
| Aegolius funereus | 43.3984  | 19.8064  |
| Aegolius funereus | 43.395   | 19.7979  |
| Aegolius funereus | 43.3928  | 19.8127  |
| Aegolius funereus | 43.3935  | 19.818   |
| Aegolius funereus | 43.3962  | 19.8461  |

|                   |          |          |
|-------------------|----------|----------|
| Aegolius funereus | 43.4018  | 19.8243  |
| Aegolius funereus | 43.5988  | 19.7892  |
| Aegolius funereus | 43.5944  | 19.7821  |
| Aegolius funereus | 43.605   | 19.7691  |
| Aegolius funereus | 43.6072  | 19.7596  |
| Aegolius funereus | 43.591   | 19.8004  |
| Aegolius funereus | 43.9364  | 19.4181  |
| Aegolius funereus | 43.9005  | 19.3371  |
| Aegolius funereus | 43.9013  | 19.3425  |
| Aegolius funereus | 43.8955  | 19.507   |
| Aegolius funereus | 43.9154  | 19.4198  |
| Aegolius funereus | 43.9353  | 19.4036  |
| Aegolius funereus | 43.3139  | 19.7969  |
| Aegolius funereus | 43.3313  | 19.7821  |
| Aegolius funereus | 43.3194  | 20.7628  |
| Aegolius funereus | 43.3178  | 20.7704  |
| Aegolius funereus | 43.3189  | 20.7787  |
| Aegolius funereus | 43.3418  | 20.7803  |
| Aegolius funereus | 43.2948  | 20.7878  |
| Aegolius funereus | 43.3373  | 20.7599  |
| Aegolius funereus | 43.309   | 20.805   |
| Aegolius funereus | 43.3224  | 20.3718  |
| Aegolius funereus | 43.3309  | 20.3696  |
| Aegolius funereus | 43.344   | 20.2845  |
| Aegolius funereus | 43.34    | 20.239   |
| Aegolius funereus | 43.8978  | 19.3247  |
| Aegolius funereus | 43.2957  | 20.7803  |
| Aegolius funereus | 43.2817  | 20.7771  |
| Aegolius funereus | 43.2861  | 20.7829  |
| Aegolius funereus | 43.9215  | 19.3872  |
| Aegolius funereus | 43.3344  | 20.3794  |
| Aegolius funereus | 42.9773  | 20.1163  |
| Aegolius funereus | 43.4873  | 20.7979  |
| Aegolius funereus | 43.3816  | 19.8407  |
| Aegolius funereus | 42.8787  | 20.5005  |
| Aegolius funereus | 43.33    | 20.7712  |
| Aegolius funereus | 43.4784  | 19.8629  |
| Aegolius funereus | 43.4167  | 20.0824  |
| Aegolius funereus | 43.4175  | 20.0606  |
| Aegolius funereus | 43.30562 | 20.78818 |
| Aegolius funereus | 43.30497 | 20.80268 |
| Aegolius funereus | 43.32163 | 20.82266 |
| Aegolius funereus | 43.33096 | 20.74991 |

|                   |          |          |
|-------------------|----------|----------|
| Aegolius funereus | 43.90499 | 19.33122 |
| Aegolius funereus | 43.91697 | 19.31749 |
| Aegolius funereus | 43.9612  | 19.31228 |
| Aegolius funereus | 43.88391 | 19.52292 |
| Aegolius funereus | 43.32119 | 20.77983 |
| Aegolius funereus | 43.31337 | 20.35142 |
| Aegolius funereus | 43.34713 | 20.23083 |
| Aegolius funereus | 43.29186 | 20.32342 |
| Aegolius funereus | 43.33688 | 20.27847 |
| Aegolius funereus | 43.46126 | 20.41206 |
| Aegolius funereus | 43.33762 | 20.39075 |
| Aegolius funereus | 42.90277 | 20.44177 |
| Aegolius funereus | 42.88914 | 20.43474 |
| Aegolius funereus | 43.30543 | 19.77421 |
| Aegolius funereus | 45.89408 | 14.51357 |
| Aegolius funereus | 45.67716 | 14.69939 |
| Aegolius funereus | 45.74389 | 14.31681 |
| Aegolius funereus | 45.90171 | 14.45216 |
| Aegolius funereus | 45.91664 | 14.48109 |
| Aegolius funereus | 45.91969 | 14.45062 |
| Aegolius funereus | 45.8563  | 14.40927 |
| Aegolius funereus | 45.75261 | 14.5579  |
| Aegolius funereus | 45.80824 | 14.14564 |
| Aegolius funereus | 45.82878 | 14.11639 |
| Aegolius funereus | 45.84123 | 14.07628 |
| Aegolius funereus | 45.87918 | 14.35638 |
| Aegolius funereus | 45.90699 | 14.47364 |
| Aegolius funereus | 45.91671 | 14.46775 |
| Aegolius funereus | 45.89156 | 14.32541 |
| Aegolius funereus | 45.73758 | 14.64739 |
| Aegolius funereus | 45.72841 | 14.64276 |
| Aegolius funereus | 45.8228  | 14.14563 |
| Aegolius funereus | 45.77088 | 15.31954 |
| Aegolius funereus | 45.78553 | 14.31791 |
| Aegolius funereus | 45.56065 | 14.32836 |
| Aegolius funereus | 45.73716 | 14.69053 |
| Aegolius funereus | 45.57458 | 15.06136 |
| Aegolius funereus | 45.67194 | 14.64701 |
| Aegolius funereus | 45.73896 | 14.30523 |
| Aegolius funereus | 45.59868 | 14.73773 |
| Aegolius funereus | 45.67521 | 14.68838 |
| Aegolius funereus | 45.8935  | 14.46567 |
| Aegolius funereus | 45.89071 | 14.47595 |

|                   |          |          |
|-------------------|----------|----------|
| Aegolius funereus | 45.9046  | 14.44193 |
| Aegolius funereus | 45.65812 | 15.05144 |
| Aegolius funereus | 45.6855  | 15.02552 |
| Aegolius funereus | 45.83024 | 14.08027 |
| Aegolius funereus | 45.78246 | 15.3821  |
| Aegolius funereus | 45.70396 | 14.9705  |
| Aegolius funereus | 45.75363 | 14.98381 |
| Aegolius funereus | 45.79177 | 15.38122 |
| Aegolius funereus | 45.79805 | 15.39155 |
| Aegolius funereus | 45.73776 | 15.25349 |
| Aegolius funereus | 45.74588 | 15.26606 |
| Aegolius funereus | 45.76845 | 15.30911 |
| Aegolius funereus | 45.86419 | 14.33501 |
| Aegolius funereus | 45.83693 | 14.3466  |
| Aegolius funereus | 45.83006 | 14.35887 |
| Aegolius funereus | 45.61215 | 14.4953  |
| Aegolius funereus | 45.92238 | 14.32673 |
| Aegolius funereus | 45.89613 | 14.33467 |
| Aegolius funereus | 45.81202 | 14.04246 |
| Aegolius funereus | 45.65725 | 14.95674 |
| Aegolius funereus | 46.09609 | 15.07178 |
| Aegolius funereus | 45.86973 | 14.10646 |
| Aegolius funereus | 45.68586 | 14.44458 |
| Aegolius funereus | 45.67513 | 14.82837 |
| Aegolius funereus | 45.59104 | 14.32025 |
| Aegolius funereus | 45.58089 | 14.42273 |
| Aegolius funereus | 45.56941 | 14.41346 |
| Aegolius funereus | 45.87131 | 14.33829 |
| Aegolius funereus | 45.53004 | 14.44762 |
| Aegolius funereus | 45.52908 | 14.42213 |
| Aegolius funereus | 45.53828 | 14.38651 |
| Aegolius funereus | 45.68915 | 14.70554 |
| Aegolius funereus | 45.69011 | 14.71893 |
| Aegolius funereus | 45.7093  | 14.67018 |
| Aegolius funereus | 45.67956 | 14.64649 |
| Aegolius funereus | 45.65581 | 14.67396 |
| Aegolius funereus | 45.69235 | 14.54584 |
| Aegolius funereus | 45.59927 | 14.39278 |
| Aegolius funereus | 45.5914  | 14.39921 |
| Aegolius funereus | 45.57073 | 14.39226 |
| Aegolius funereus | 45.56713 | 14.37716 |
| Aegolius funereus | 45.65029 | 14.42196 |
| Aegolius funereus | 45.72937 | 14.30789 |

|                       |          |          |
|-----------------------|----------|----------|
| Aegolius funereus     | 45.92836 | 14.4139  |
| Aegolius funereus     | 45.94894 | 14.46818 |
| Aegolius funereus     | 45.88915 | 14.31231 |
| Aegolius funereus     | 45.65245 | 15.06844 |
| Aegolius funereus     | 45.66145 | 15.04582 |
| Aegolius funereus     | 45.72485 | 14.37342 |
| Aegolius funereus     | 45.86596 | 14.39221 |
| Aegolius funereus     | 45.8725  | 14.40546 |
| Aegolius funereus     | 45.86932 | 14.41834 |
| Aegolius funereus     | 45.8802  | 14.41778 |
| Aegolius funereus     | 45.91951 | 14.40005 |
| Aegolius funereus     | 45.94548 | 14.41091 |
| Aegolius funereus     | 45.92077 | 14.42068 |
| Glaucidium passerinum | 43.76897 | 18.24471 |
| Glaucidium passerinum | 44.17101 | 18.38764 |
| Glaucidium passerinum | 44.16591 | 18.28155 |
| Glaucidium passerinum | 44.13277 | 18.45732 |
| Glaucidium passerinum | 44.13104 | 18.4448  |
| Glaucidium passerinum | 44.17444 | 18.40641 |
| Glaucidium passerinum | 43.92544 | 18.65861 |
| Glaucidium passerinum | 44.28804 | 18.61671 |
| Glaucidium passerinum | 44.18496 | 18.29485 |
| Glaucidium passerinum | 43.29641 | 18.73419 |
| Glaucidium passerinum | 43.30487 | 18.7392  |
| Glaucidium passerinum | 43.3082  | 18.73361 |
| Glaucidium passerinum | 43.81306 | 17.43819 |
| Glaucidium passerinum | 43.53718 | 19.09296 |
| Glaucidium passerinum | 44.19159 | 18.30569 |
| Glaucidium passerinum | 44.17949 | 18.39212 |
| Glaucidium passerinum | 44.17924 | 18.30667 |
| Glaucidium passerinum | 44.16299 | 18.4483  |
| Glaucidium passerinum | 44.20442 | 18.31006 |
| Glaucidium passerinum | 44.21864 | 18.31014 |
| Glaucidium passerinum | 44.17391 | 18.37126 |
| Glaucidium passerinum | 44.23001 | 18.30744 |
| Glaucidium passerinum | 44.08274 | 18.37871 |
| Glaucidium passerinum | 44.2088  | 18.27607 |
| Glaucidium passerinum | 44.20394 | 18.29512 |
| Glaucidium passerinum | 44.16391 | 18.41164 |
| Glaucidium passerinum | 44.16746 | 18.42435 |
| Glaucidium passerinum | 44.15722 | 18.42132 |
| Glaucidium passerinum | 44.14699 | 18.42776 |
| Glaucidium passerinum | 44.13872 | 18.38317 |

|                       |          |          |
|-----------------------|----------|----------|
| Glaucidium passerinum | 44.2836  | 17.56373 |
| Glaucidium passerinum | 44.39389 | 17.02813 |
| Glaucidium passerinum | 43.92445 | 17.04789 |
| Glaucidium passerinum | 43.74329 | 18.04852 |
| Glaucidium passerinum | 43.7267  | 18.25715 |
| Glaucidium passerinum | 43.73451 | 18.22461 |
| Glaucidium passerinum | 43.75146 | 18.24725 |
| Glaucidium passerinum | 43.78773 | 18.26706 |
| Glaucidium passerinum | 43.77614 | 18.29328 |
| Glaucidium passerinum | 43.7295  | 18.26626 |
| Glaucidium passerinum | 44.22287 | 18.2443  |
| Glaucidium passerinum | 44.23666 | 18.20897 |
| Glaucidium passerinum | 44.1985  | 17.01416 |
| Glaucidium passerinum | 44.17961 | 17.01985 |
| Glaucidium passerinum | 44.17196 | 17.02856 |
| Glaucidium passerinum | 44.16814 | 17.01416 |
| Glaucidium passerinum | 44.16061 | 17.03287 |
| Glaucidium passerinum | 44.1757  | 17.0678  |
| Glaucidium passerinum | 44.16658 | 17.05565 |
| Glaucidium passerinum | 44.14773 | 17.06304 |
| Glaucidium passerinum | 44.15699 | 17.0684  |
| Glaucidium passerinum | 41.74192 | 23.54338 |
| Glaucidium passerinum | 41.76453 | 23.52176 |
| Glaucidium passerinum | 41.64717 | 23.41891 |
| Glaucidium passerinum | 41.82534 | 23.36254 |
| Glaucidium passerinum | 41.63248 | 23.49517 |
| Glaucidium passerinum | 41.81694 | 23.42126 |
| Glaucidium passerinum | 41.74192 | 23.54338 |
| Glaucidium passerinum | 41.66081 | 23.41561 |
| Glaucidium passerinum | 41.79182 | 23.44312 |
| Glaucidium passerinum | 41.77297 | 23.46011 |
| Glaucidium passerinum | 41.78742 | 23.48976 |
| Glaucidium passerinum | 41.81597 | 24.08763 |
| Glaucidium passerinum | 41.83923 | 24.01203 |
| Glaucidium passerinum | 41.84176 | 23.96684 |
| Glaucidium passerinum | 41.88345 | 24.31158 |
| Glaucidium passerinum | 41.86894 | 24.2832  |
| Glaucidium passerinum | 41.83948 | 24.30929 |
| Glaucidium passerinum | 41.68468 | 24.84687 |
| Glaucidium passerinum | 42.24271 | 23.62288 |
| Glaucidium passerinum | 42.24991 | 23.6074  |
| Glaucidium passerinum | 42.24415 | 23.59506 |
| Glaucidium passerinum | 42.25392 | 23.59445 |

|                       |          |          |
|-----------------------|----------|----------|
| Glaucidium passerinum | 41.60224 | 24.62572 |
| Glaucidium passerinum | 41.61897 | 24.6161  |
| Glaucidium passerinum | 41.62391 | 24.60923 |
| Glaucidium passerinum | 41.61744 | 24.60691 |
| Glaucidium passerinum | 41.58206 | 24.56781 |
| Glaucidium passerinum | 41.93281 | 23.98935 |
| Glaucidium passerinum | 41.92807 | 23.98418 |
| Glaucidium passerinum | 42.22999 | 23.42526 |
| Glaucidium passerinum | 42.22357 | 23.44327 |
| Glaucidium passerinum | 42.21499 | 23.39009 |
| Glaucidium passerinum | 41.7289  | 24.59648 |
| Glaucidium passerinum | 41.63815 | 24.54069 |
| Glaucidium passerinum | 41.64096 | 24.53692 |
| Glaucidium passerinum | 41.64688 | 24.54288 |
| Glaucidium passerinum | 41.64811 | 24.53044 |
| Glaucidium passerinum | 41.62294 | 24.56165 |
| Glaucidium passerinum | 41.61915 | 24.58043 |
| Glaucidium passerinum | 41.62359 | 24.59613 |
| Glaucidium passerinum | 41.64836 | 24.12788 |
| Glaucidium passerinum | 41.63355 | 24.66386 |
| Glaucidium passerinum | 41.39106 | 23.59672 |
| Glaucidium passerinum | 41.59102 | 24.80161 |
| Glaucidium passerinum | 41.89802 | 24.06073 |
| Glaucidium passerinum | 41.87183 | 24.29947 |
| Glaucidium passerinum | 42.18512 | 23.56946 |
| Glaucidium passerinum | 41.72559 | 23.43714 |
| Glaucidium passerinum | 42.5554  | 23.2501  |
| Glaucidium passerinum | 42       | 24.15003 |
| Glaucidium passerinum | 41.9003  | 25.8501  |
| Glaucidium passerinum | 42.20023 | 23.61    |
| Glaucidium passerinum | 41.9512  | 24.152   |
| Glaucidium passerinum | 42.201   | 23.601   |
| Glaucidium passerinum | 42.16538 | 23.79158 |
| Glaucidium passerinum | 41.84303 | 24.12909 |
| Glaucidium passerinum | 42.19686 | 23.5761  |
| Glaucidium passerinum | 41.97799 | 23.4707  |
| Glaucidium passerinum | 41.73046 | 24.66396 |
| Glaucidium passerinum | 42.26626 | 23.60387 |
| Glaucidium passerinum | 42.19673 | 23.46298 |
| Glaucidium passerinum | 41.61952 | 24.49041 |
| Glaucidium passerinum | 43.90431 | 16.45022 |
| Glaucidium passerinum | 44.94052 | 15.52013 |
| Glaucidium passerinum | 44.91159 | 15.52884 |

|                       |          |          |
|-----------------------|----------|----------|
| Glaucidium passerinum | 44.82201 | 15.7191  |
| Glaucidium passerinum | 44.80765 | 15.70525 |
| Glaucidium passerinum | 44.72295 | 15.19378 |
| Glaucidium passerinum | 44.82948 | 15.01454 |
| Glaucidium passerinum | 44.8771  | 15.02599 |
| Glaucidium passerinum | 41.48734 | 24.12795 |
| Glaucidium passerinum | 41.51281 | 24.33224 |
| Glaucidium passerinum | 41.50851 | 24.32492 |
| Glaucidium passerinum | 41.49247 | 24.31052 |
| Glaucidium passerinum | 41.50272 | 24.31026 |
| Glaucidium passerinum | 41.49299 | 24.32619 |
| Glaucidium passerinum | 41.48488 | 24.30864 |
| Glaucidium passerinum | 41.49108 | 24.3042  |
| Glaucidium passerinum | 41.47588 | 24.31448 |
| Glaucidium passerinum | 41.55495 | 24.52848 |
| Glaucidium passerinum | 41.49148 | 24.30253 |
| Glaucidium passerinum | 41.42641 | 24.57421 |
| Glaucidium passerinum | 43.07427 | 19.23363 |
| Glaucidium passerinum | 42.56024 | 19.9998  |
| Glaucidium passerinum | 42.70372 | 19.90698 |
| Glaucidium passerinum | 43.52149 | 19.14223 |
| Glaucidium passerinum | 43.08506 | 19.26122 |
| Glaucidium passerinum | 43.04794 | 19.42974 |
| Glaucidium passerinum | 42.58675 | 20.01552 |
| Glaucidium passerinum | 42.59585 | 20.03641 |
| Glaucidium passerinum | 43.16974 | 19.37944 |
| Glaucidium passerinum | 42.57625 | 20.04038 |
| Glaucidium passerinum | 43.06004 | 19.48154 |
| Glaucidium passerinum | 43.1967  | 19.04584 |
| Glaucidium passerinum | 43.5029  | 19.0725  |
| Glaucidium passerinum | 43.09629 | 19.25732 |
| Glaucidium passerinum | 42.70382 | 19.9147  |
| Glaucidium passerinum | 43.05246 | 19.48838 |
| Glaucidium passerinum | 42.75685 | 19.99781 |
| Glaucidium passerinum | 43.27186 | 18.92816 |
| Glaucidium passerinum | 43.09042 | 19.21976 |
| Glaucidium passerinum | 43.27231 | 18.91677 |
| Glaucidium passerinum | 42.61874 | 19.83671 |
| Glaucidium passerinum | 43.28333 | 19.10614 |
| Glaucidium passerinum | 42.79033 | 20.02299 |
| Glaucidium passerinum | 42.66248 | 20.02055 |
| Glaucidium passerinum | 42.72518 | 19.98545 |
| Glaucidium passerinum | 42.81867 | 19.77059 |

|                       |          |          |
|-----------------------|----------|----------|
| Glaucidium passerinum | 42.8757  | 19.71728 |
| Glaucidium passerinum | 43.0435  | 19.4545  |
| Glaucidium passerinum | 43.30341 | 18.93219 |
| Glaucidium passerinum | 42.57462 | 19.97887 |
| Glaucidium passerinum | 42.76624 | 19.90968 |
| Glaucidium passerinum | 43.0608  | 19.35949 |
| Glaucidium passerinum | 43.29251 | 18.92668 |
| Glaucidium passerinum | 43.04741 | 19.51784 |
| Glaucidium passerinum | 42.76309 | 19.98987 |
| Glaucidium passerinum | 43.19041 | 19.32841 |
| Glaucidium passerinum | 42.58385 | 20.02474 |
| Glaucidium passerinum | 43.04524 | 19.54205 |
| Glaucidium passerinum | 43.03762 | 19.43946 |
| Glaucidium passerinum | 43.03762 | 19.43914 |
| Glaucidium passerinum | 43.0881  | 19.45425 |
| Glaucidium passerinum | 43.07169 | 19.462   |
| Glaucidium passerinum | 43.0678  | 19.47556 |
| Glaucidium passerinum | 43.06653 | 19.50769 |
| Glaucidium passerinum | 43.88387 | 19.52307 |
| Glaucidium passerinum | 43.89771 | 19.50089 |
| Glaucidium passerinum | 43.90578 | 19.49427 |
| Glaucidium passerinum | 43.91319 | 19.45213 |
| Glaucidium passerinum | 43.92623 | 19.45616 |
| Glaucidium passerinum | 43.93731 | 19.41762 |
| Glaucidium passerinum | 43.93326 | 19.3913  |
| Glaucidium passerinum | 43.90465 | 19.31735 |
| Glaucidium passerinum | 43.91522 | 19.30369 |
| Glaucidium passerinum | 43.92186 | 19.29618 |
| Glaucidium passerinum | 43.40495 | 19.81554 |
| Glaucidium passerinum | 42.88785 | 20.42667 |
| Glaucidium passerinum | 42.8601  | 20.36356 |
| Glaucidium passerinum | 42.84897 | 20.35975 |
| Glaucidium passerinum | 42.89536 | 20.49905 |
| Glaucidium passerinum | 43.32547 | 22.80695 |
| Glaucidium passerinum | 43.58536 | 19.79844 |
| Glaucidium passerinum | 43.59899 | 19.79453 |
| Glaucidium passerinum | 43.60558 | 19.78094 |
| Glaucidium passerinum | 43.88275 | 19.55537 |
| Glaucidium passerinum | 43.31872 | 19.53105 |
| Glaucidium passerinum | 43.30844 | 19.53942 |
| Glaucidium passerinum | 43.30549 | 20.3203  |
| Glaucidium passerinum | 43.34821 | 20.24255 |
| Glaucidium passerinum | 43.32827 | 20.75711 |

|                       |          |          |
|-----------------------|----------|----------|
| Glaucidium passerinum | 43.30239 | 20.79018 |
| Glaucidium passerinum | 42.84932 | 20.38495 |
| Glaucidium passerinum | 43.93778 | 19.40505 |
| Glaucidium passerinum | 43.40159 | 19.77025 |
| Glaucidium passerinum | 43.41635 | 19.78487 |
| Glaucidium passerinum | 45.70587 | 14.33897 |
| Glaucidium passerinum | 45.70521 | 14.66742 |
| Glaucidium passerinum | 45.5658  | 14.41875 |
| Glaucidium passerinum | 45.57138 | 14.4538  |
| Glaucidium passerinum | 45.66136 | 14.34866 |
| Glaucidium passerinum | 45.74547 | 14.33041 |
| Glaucidium passerinum | 45.58383 | 14.36016 |
| Glaucidium passerinum | 45.67583 | 14.55895 |
| Glaucidium passerinum | 45.54498 | 14.45892 |
| Glaucidium passerinum | 45.58269 | 14.41623 |
| Glaucidium passerinum | 45.6415  | 14.42014 |
| Glaucidium passerinum | 45.656   | 14.47776 |
| Glaucidium passerinum | 45.92814 | 14.4122  |
| Glaucidium passerinum | 45.58416 | 14.49545 |
| Glaucidium passerinum | 45.87994 | 14.241   |
| Glaucidium passerinum | 45.74535 | 14.34948 |
| Glaucidium passerinum | 45.71512 | 15.01345 |
| Glaucidium passerinum | 45.82796 | 14.35089 |
| Glaucidium passerinum | 45.8812  | 14.33518 |
| Glaucidium passerinum | 45.90148 | 14.33235 |
| Glaucidium passerinum | 45.90897 | 14.442   |
| Glaucidium passerinum | 45.76016 | 14.32205 |
| Glaucidium passerinum | 45.67518 | 14.68782 |
| Glaucidium passerinum | 45.85436 | 14.09752 |
| Glaucidium passerinum | 45.83251 | 14.09477 |
| Glaucidium passerinum | 45.87023 | 14.14799 |
| Glaucidium passerinum | 45.6366  | 14.3466  |
| Glaucidium passerinum | 45.63661 | 14.34649 |

**Table S2.** List of the six predictor variables, used for predicting future distribution of the Boreal and the Eurasian Pygmy Owl, with their sources form where they were obtained.

| Environmental variable        | Source      | Reference                                                                                                                                                                     |
|-------------------------------|-------------|-------------------------------------------------------------------------------------------------------------------------------------------------------------------------------|
| Bioclimatic variables         | Worldclim   | <a href="https://www.worldclim.org/">https://www.worldclim.org/</a>                                                                                                           |
| Digital Elevation Model (DEM) | Worldclim   | <a href="https://www.worldclim.org/">https://www.worldclim.org/</a>                                                                                                           |
| Aspect                        | ArcGIS tool | <a href="https://pro.arcgis.com/en/pro-app/2.8/tool-reference/spatial-analyst/aspect.htm">https://pro.arcgis.com/en/pro-app/2.8/tool-reference/spatial-analyst/aspect.htm</a> |
| Slope                         | ArcGIS tool | <a href="https://pro.arcgis.com/en/pro-app/2.8/tool-reference/spatial-analyst/slope.htm">https://pro.arcgis.com/en/pro-app/2.8/tool-reference/spatial-analyst/slope.htm</a>   |

|                       |                                                |                                                                                                                                                                                                                                                             |
|-----------------------|------------------------------------------------|-------------------------------------------------------------------------------------------------------------------------------------------------------------------------------------------------------------------------------------------------------------|
| Soil type             | LUCAS: Land Use and Coverage Area frame Survey | <a href="https://ec.europa.eu/eurostat/statistics-explained/index.php?title=Glossary:Land_use_-_cover_area_frame_survey_(LUCAS)">https://ec.europa.eu/eurostat/statistics-explained/index.php?title=Glossary:Land_use_-_cover_area_frame_survey_(LUCAS)</a> |
| Hill shade            | ArcGIS tool                                    | <a href="https://pro.arcgis.com/en/pro-app/2.8/tool-reference/spatial-analyst/hillshade.htm">https://pro.arcgis.com/en/pro-app/2.8/tool-reference/spatial-analyst/hillshade.htm</a>                                                                         |
| Human footprint index | Wildlife Conservation (WCS)                    | Last of the Wild Data Version 2, 2005 (LTW-2): Global Human Footprint Dataset (Geographic). Wildlife Conservation (WCS) and Center for International Earth Science Information Network (CIESIN).                                                            |
| Snow cover            | NASA Earth Observations (NEO)                  | <a href="https://neo.gsfc.nasa.gov/">https://neo.gsfc.nasa.gov/</a>                                                                                                                                                                                         |
| Land-use type         | Corine Land Cover (CLC)                        | <a href="https://land.copernicus.eu/pan-european/corine-land-cover/clc2018?tab=download">https://land.copernicus.eu/pan-european/corine-land-cover/clc2018?tab=download</a>                                                                                 |

**Table S3.** Boreal Owl's current and future area (km<sup>2</sup>) of highly suitable habitats in each Balkan country.

|         |                        |            |
|---------|------------------------|------------|
| Current |                        |            |
|         | Country                | Area (km2) |
|         | Albania                | 3          |
|         | North Macedonia        | 6          |
|         | Bulgaria               | 47         |
|         | Bosnia and Herzegovina | 54         |
|         | Greece                 | 3          |
|         | Montenegro             | 32         |
|         | Slovenia               | 19         |
|         | Croatia                | 34         |
|         | Serbia                 | 63         |
| SSP 126 | Period 2041 - 2060     |            |
|         | Country                | Area (km2) |
|         | Albania                | 3          |
|         | North Macedonia        | 6          |
|         | Bulgaria               | 50         |
|         | Bosnia and Herzegovina | 55         |
|         | Greece                 | 3          |
|         | Montenegro             | 36         |
|         | Slovenia               | 25         |
|         | Croatia                | 29         |
|         | Serbia                 | 69         |
| SSP 126 | Period 2061 - 2080     |            |
|         | Country                | Area (km2) |
|         | Albania                | 5          |
|         | North Macedonia        | 5          |
|         | Bulgaria               | 28         |
|         | Bosnia and Herzegovina | 51         |
|         | Greece                 | 0          |
|         | Montenegro             | 38         |
|         | Slovenia               | 20         |
|         | Croatia                | 29         |

|         |                        |            |
|---------|------------------------|------------|
|         | Serbia                 | 73         |
| SSP 245 | Period 2041 - 2060     |            |
|         | Country                | Area (km2) |
|         | Albania                | 6          |
|         | North Macedonia        | 6          |
|         | Bulgaria               | 37         |
|         | Bosnia and Herzegovina | 70         |
|         | Greece                 | 0          |
|         | Montenegro             | 42         |
|         | Slovenia               | 15         |
|         | Croatia                | 20         |
|         | Serbia                 | 70         |
| SSP 245 | Period 2061 - 2080     |            |
|         | Country                | Area (km2) |
|         | Albania                | 5          |
|         | North Macedonia        | 8          |
|         | Bulgaria               | 28         |
|         | Bosnia and Herzegovina | 47         |
|         | Greece                 | 0          |
|         | Montenegro             | 34         |
|         | Slovenia               | 22         |
|         | Croatia                | 26         |
|         | Serbia                 | 78         |
| SSP 370 | Period 2041 - 2060     |            |
|         | Country                | Area (km2) |
|         | Albania                | 4          |
|         | North Macedonia        | 6          |
|         | Bulgaria               | 43         |
|         | Bosnia and Herzegovina | 61         |
|         | Greece                 | 0          |
|         | Montenegro             | 38         |
|         | Slovenia               | 19         |
|         | Croatia                | 31         |
|         | Serbia                 | 78         |
| SSP 370 | Period 2061 - 2080     |            |
|         | Country                | Area (km2) |
|         | Albania                | 5          |
|         | North Macedonia        | 12         |
|         | Bulgaria               | 34         |
|         | Bosnia and Herzegovina | 48         |
|         | Greece                 | 0          |
|         | Montenegro             | 35         |
|         | Slovenia               | 20         |
|         | Croatia                | 29         |

|         |                        |                         |
|---------|------------------------|-------------------------|
|         | Serbia                 | 64                      |
| SSP 585 | Period 2041 - 2060     |                         |
|         | Country                | Area (km2)              |
|         | Albania                | 1                       |
|         | North Macedonia        | 5                       |
|         | Bulgaria               | 36                      |
|         | Bosnia and Herzegovina | 53                      |
|         | Greece                 | 1                       |
|         | Montenegro             | 28                      |
|         | Slovenia               | 23                      |
|         | Croatia                | 26                      |
|         | Serbia                 | 49                      |
| SSP 585 | Period 2061 - 2080     |                         |
|         | Country                | Area (km <sup>2</sup> ) |
|         | Albania                | 3                       |
|         | North Macedonia        | 5                       |
|         | Bulgaria               | 34                      |
|         | Bosnia and Herzegovina | 53                      |
|         | Greece                 | 1                       |
|         | Montenegro             | 32                      |
|         | Slovenia               | 14                      |
|         | Croatia                | 23                      |
|         | Serbia                 | 68                      |

**Table S4.** Eurasian Pygmy Owl's current and future area (km<sup>2</sup>) of highly suitable habitats in each Balkan country.

|         |                        |                         |
|---------|------------------------|-------------------------|
| Current |                        |                         |
|         | Country                | Area (km <sup>2</sup> ) |
|         | Albania                | 5                       |
|         | North Macedonia        | 11                      |
|         | Bulgaria               | 44                      |
|         | Bosnia and Herzegovina | 47                      |
|         | Greece                 | 6                       |
|         | Montenegro             | 33                      |
|         | Slovenia               | 10                      |
|         | Croatia                | 9                       |
|         | Serbia                 | 68                      |
| SSP 126 | Period 2041 - 2060     |                         |
|         | Country                | Area (km <sup>2</sup> ) |

|                        |    |
|------------------------|----|
| Albania                | 7  |
| North Macedonia        | 3  |
| Bulgaria               | 26 |
| Bosnia and Herzegovina | 47 |
| Greece                 | 5  |
| Montenegro             | 35 |
| Slovenia               | 18 |
| Croatia                | 15 |
| Serbia                 | 58 |

---

|         |                        |                         |
|---------|------------------------|-------------------------|
| SSP 126 | Period 2061 - 2080     |                         |
|         | Country                | Area (km <sup>2</sup> ) |
|         | Albania                | 8                       |
|         | North Macedonia        | 10                      |
|         | Bulgaria               | 39                      |
|         | Bosnia and Herzegovina | 46                      |
|         | Greece                 | 6                       |
|         | Montenegro             | 42                      |
|         | Slovenia               | 16                      |
|         | Croatia                | 14                      |
|         | Serbia                 | 57                      |

---

|         |                        |                         |
|---------|------------------------|-------------------------|
| SSP 245 | Period 2041 - 2060     |                         |
|         | Country                | Area (km <sup>2</sup> ) |
|         | Albania                | 6                       |
|         | North Macedonia        | 5                       |
|         | Bulgaria               | 34                      |
|         | Bosnia and Herzegovina | 56                      |
|         | Greece                 | 5                       |
|         | Montenegro             | 35                      |
|         | Slovenia               | 12                      |
|         | Croatia                | 13                      |
|         | Serbia                 | 46                      |

---

|         |                  |  |
|---------|------------------|--|
| SSP 245 | Period 2061-2080 |  |
|---------|------------------|--|

|         |                        |                         |
|---------|------------------------|-------------------------|
|         | Country                | Area (km <sup>2</sup> ) |
|         | Albania                | 6                       |
|         | North Macedonia        | 15                      |
|         | Bulgaria               | 47                      |
|         | Bosnia and Herzegovina | 42                      |
|         | Greece                 | 8                       |
|         | Montenegro             | 31                      |
|         | Slovenia               | 11                      |
|         | Croatia                | 15                      |
|         | Serbia                 | 63                      |
| SSP 370 | Period 2041 - 2060     |                         |
|         | Country                | Area (km <sup>2</sup> ) |
|         | Albania                | 7                       |
|         | North Macedonia        | 9                       |
|         | Bulgaria               | 30                      |
|         | Bosnia and Herzegovina | 52                      |
|         | Greece                 | 8                       |
|         | Montenegro             | 36                      |
|         | Slovenia               | 11                      |
|         | Croatia                | 14                      |
|         | Serbia                 | 39                      |
| SSP 370 | Period 2061-2080       |                         |
|         | Country                | Area (km <sup>2</sup> ) |
|         | Albania                | 7                       |
|         | North Macedonia        | 13                      |
|         | Bulgaria               | 45                      |
|         | Bosnia and Herzegovina | 45                      |
|         | Greece                 | 9                       |
|         | Montenegro             | 33                      |
|         | Slovenia               | 5                       |
|         | Croatia                | 12                      |
|         | Serbia                 | 63                      |

|         |                        |                         |
|---------|------------------------|-------------------------|
| SSP 585 | Period 2041 - 2060     |                         |
|         | Country                | Area (km <sup>2</sup> ) |
|         | Albania                | 5                       |
|         | North Macedonia        | 9                       |
|         | Bulgaria               | 31                      |
|         | Bosnia and Herzegovina | 47                      |
|         | Greece                 | 8                       |
|         | Montenegro             | 33                      |
|         | Slovenia               | 10                      |
|         | Croatia                | 15                      |
|         | Serbia                 | 57                      |
| <hr/>   |                        |                         |
| SSP 585 | Period 2061-2080       |                         |
|         | Country                | Area (km <sup>2</sup> ) |
|         | Albania                | 7                       |
|         | North Macedonia        | 14                      |
|         | Bulgaria               | 38                      |
|         | Bosnia and Herzegovina | 59                      |
|         | Greece                 | 11                      |
|         | Montenegro             | 36                      |
|         | Slovenia               | 11                      |
|         | Croatia                | 16                      |
|         | Serbia                 | 58                      |
| <hr/>   |                        |                         |
